# Supplementary material for: Preparation of a Mulberry-like MnO Specimen and Its Lithium Property
Source: MDPI journal article supplement (doi:10.3390/pr10061110), 2022-06-02
Supplement: s1 [file s1]

## Supplementary Materials

### Preparation of a Mulberry-Like MnO Specimen and Its Lithium Property

Yuan-Xiang Fu <sup>1,2,\*</sup>, Hong-Shen Huang <sup>1</sup>, Wu-Jie Ge <sup>1</sup>, Wei Qiu <sup>1</sup>, Xian-Yinan Pei <sup>3,4,\*</sup>

<sup>1</sup> Guizhou Provincial Key Laboratory of Energy Chemistry, Guizhou Institute of Technology, School of Chemical Engineering, Guiyang 550003, China;

20140481@git.edu.cn (H.-S.H.); 20170816@git.edu.cn (W.-J.G.)

20150622@git.edu.cn (W.Q.)

<sup>2</sup> Guangdong Engineering Technology Research Centre for Advanced Thermal Control Material and System Integration (ATCMSI), Guangzhou 510275, China

<sup>3</sup> Institute of Materials Research, Tsinghua Shenzhen International Graduate School, Tsinghua University, Shenzhen 518055, China

<sup>4</sup> Shenzhen Dynanonic & Shenzhen Innovazone Technology Co., Ltd., Shenzhen 518055, China

\*Correspondence : fuyx8@git.edu.cn/fuyuanxiang1980@163.com,(Y.-X.F.);  
peixyn@gmail.com (X.-Y.P.)

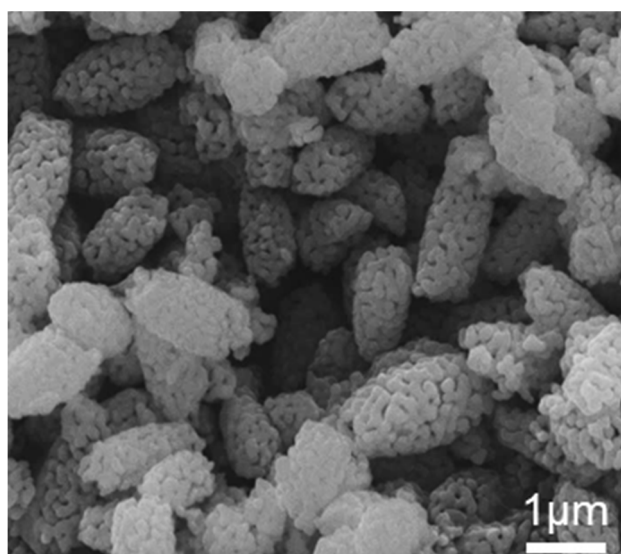

Figure S1. SEM image of MnO-500 particles.

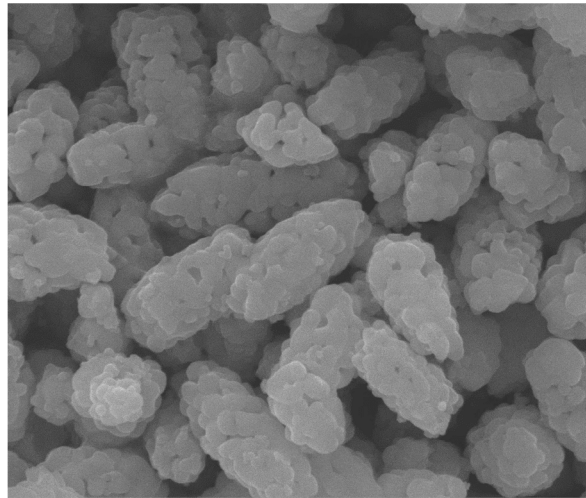

Figure S2. SEM image of MnO-600 particles.

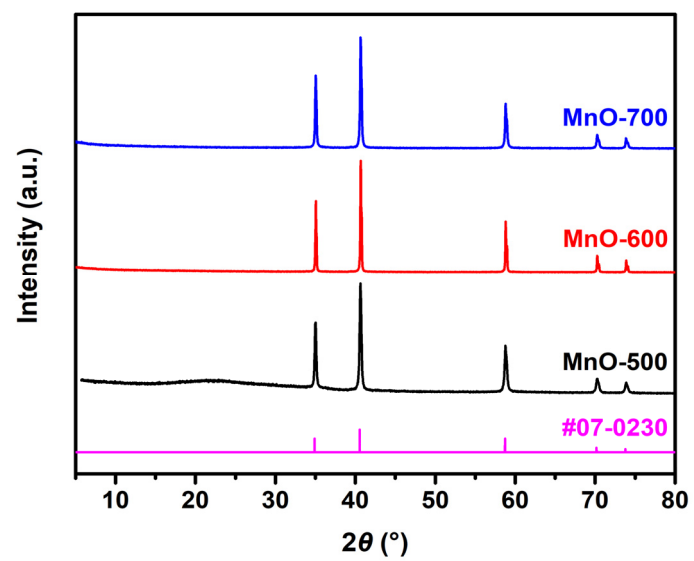

Figure S3. XRD patterns of MnO samples with 500°C, 600°C and 700°C calcination temperatures (denoted as MnO-500, MnO-600 and MnO-700, respectively).

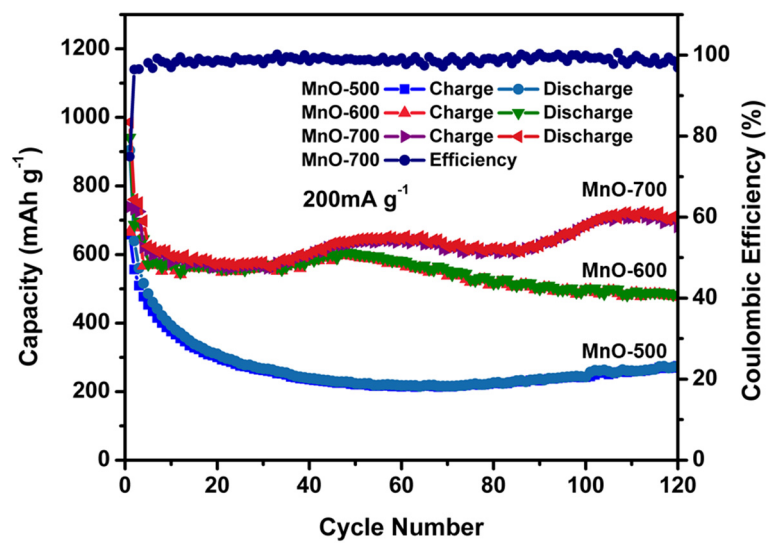

Figure S4. Cycling performances of MnO-500, MnO-600 and MnO-700 samples at 200 mA g<sup>-1</sup> and the corresponding Coulombic efficiency of the MnO-700.
